# Supplementary material
Source: PubMed Central journal article supplement (PMC2717866)
Supplement: en.2008-1141_2.pdf [file en.2008-1141_2.pdf]

**SUPPLEMENTAL TABLE 1.**

| Symbol                 | Fold change (siRNA/Ctrl) | Gene name                                              | Gene accession number | Description                                |
|------------------------|--------------------------|--------------------------------------------------------|-----------------------|--------------------------------------------|
| <b>Genes Increased</b> |                          |                                                        |                       |                                            |
| Cyp17a1                | 4.99                     | Cytochrome P450, family 17, subfamily a, polypeptide 1 | NM_012753.1           | Steroid biosynthetic process               |
| Herc6                  | 4.12                     | Potential ubiquitin ligase                             | AA943147              | Potential ubiquitin ligase                 |
| LOC689147              | 3.40                     | Hypothetical protein LOC689147                         | XM_001069739          | Hypothetical protein                       |
| Pkib                   | 3.27                     | Protein kinase inhibitor beta                          | AF413572              | Negative regulation of protein kinase      |
| Lhx2_predicted         | 3.23                     | LIM homeobox protein 2                                 | L06804                | DNA binding, transcription factor          |
| Hspa1a                 | 3.20                     | Heat shock 70kD protein 1A                             | NM_031971             | Nucleotide binding                         |
| Smc4l1                 | 3.17                     | Structural maintenance of chromosomes 4                | XM_001069997          | DNA metabolic process                      |
| Clec14a                | 3.17                     | C-type lectin domain family 14, member a               | NM_001014077          | Proteolysis                                |
| Adcyap1                | 3.01                     | Adenylate cyclase activating polypeptide 1             | NM_016989             | Adenylate cyclase activating polypeptide 1 |
| Hapln1                 | 3.00                     | Hyaluronan and proteoglycan link protein 1             | NM_019189             | Hyaluronic acid binding                    |
| Sult1b1                | 2.97                     | Sulfotransferase family 1B, member 1                   | NM_022513             | Steroid metabolic process                  |
| Top2a                  | 2.96                     | Topoisomerase (DNA) 2 alpha                            | NM_022183             | DNA metabolic process                      |
| RGD1566401_predicted   | 2.92                     | Short type PB-cadherin                                 | D83349                | Calcium ion binding                        |
| Fev                    | 2.81                     | FEV (ETS oncogene family)                              | NM_144753             | Regulation of transcription,               |
| Pbk_predicted          | 2.67                     | PDZ binding kinase                                     | NM_001079937          | Protein amino acid phosphorylation         |
| Brca2                  | 2.63                     | Breast cancer 2                                        | NM_031542             | Transcription activator                    |
| Lcn2                   | 2.63                     | Lipocalin 2                                            | NM_130741             | Transporter activity                       |
| Gja1                   | 2.61                     | Gap junction protein, alpha 1                          | NM_012567             | Signal transducer                          |
| Hsd17b1                | 2.58                     | Hydroxysteroid (17-beta) dehydrogenase 1               | NM_012851             | Steroid biosynthetic process               |
| <b>Genes Decreased</b> |                          |                                                        |                       |                                            |
| Col8a1                 | 0.4                      | Procollagen, type VIII, alpha 1                        | NM_001107100          | Extra cellular matrix                      |
| Id1                    | 0.39                     | Inhibitor of DNA binding 1                             | M86708                | Transcription repressor                    |

|        |      |                                                     |              |                                           |
|--------|------|-----------------------------------------------------|--------------|-------------------------------------------|
| Reg1   | 0.38 | Regenerating islet-derived 1                        | NM_012641    | Positive regulation of cell proliferation |
| Abca1  | 0.38 | ATP-binding cassette, sub-family A (ABC1), member 1 | NM_178095    | Biosynthetic process                      |
| Nrg1   | 0.38 | Neuregulin 1                                        | AF194443     | Transcription cofactor                    |
| Synpo2 | 0.37 | Synaptopodin 2                                      | XM_575030    | Protein binding                           |
| Enpep  | 0.36 | Glutaryl aminopeptidase                             | NM_022251    | Cell-cell signaling                       |
| Rffl   | 0.33 | Ring finger and FYVE like domain containing protein | NM_001004068 | Intracellular protein transport           |
| Selp   | 0.32 | Selectin, platelet                                  | NM_013114    | Inflammatory response                     |
| Nefh   | 0.32 | Neurofilament, heavy polypeptide                    | NM_012607    | Protein binding                           |
| Pde3b  | 0.31 | Phosphodiesterase 3B, cGMP-inhibited                | NM_017229    | Signal transduction                       |
| Anxa1  | 0.30 | Annexin A1                                          | NM_012904    | Signal transduction                       |
| Smagp  | 0.29 | Small cell adhesion glycoprotein                    | BC101910     | Small cell adhesion glycoprotein          |
| Scd1   | 0.23 | Stearoyl-Coenzyme A desaturase 1                    | NM_139192    | Lipid metabolic process                   |
| Igfbp5 | 0.23 | Insulin-like growth factor binding protein 5        | AF139830     | Insulin-like growth factor binding        |
