# Supplementary material
Source: PubMed Central journal article supplement (PMC2717866)

Supplemental Figure 1.

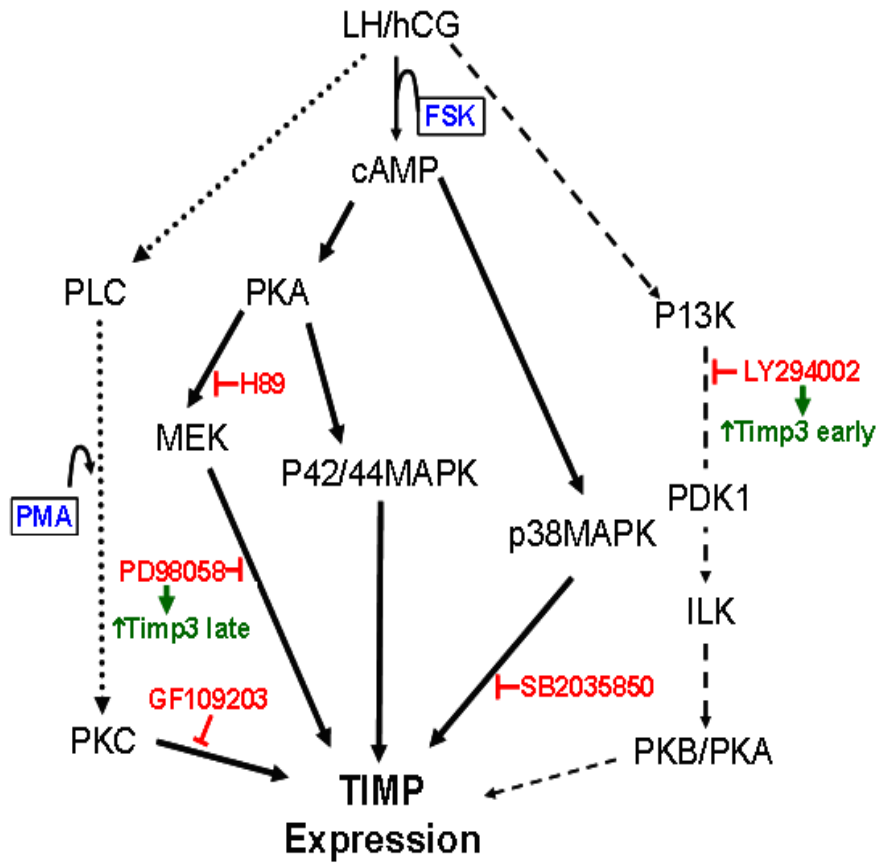

Supplement: en.2008-1141_1.pdf [file en.2008-1141_1.pdf]
